# Supplementary material
Source: ML conference proceedings conference paper supplement (https://proceedings.mlr.press/v108/vojnovic20a.html)
Supplement: Supplementary file [file vojnovic20a-supp.pdf]

## A Proofs

### A.1 Proof of Theorem 3.1

Let  $\mathbf{x}'$  be the output of the gradient descent iteration update for input  $\mathbf{x}$  with step size  $\eta$ .

If  $\mathbf{x} \in \mathcal{X}_\gamma$  and  $\mathbf{x}' \in \mathcal{X}_\mu$ , then

$$\begin{aligned}
 & f(\mathbf{x}') - f(\mathbf{x}^*) \\
 &= f(\mathbf{x} - \eta \nabla f(\mathbf{x})) - f(\mathbf{x}^*) \\
 &\leq f(\mathbf{x}) - \eta \|\nabla f(\mathbf{x})\|^2 + \frac{\mu}{2} \eta^2 \|\nabla f(\mathbf{x})\|^2 - f(\mathbf{x}^*) \\
 &= f(\mathbf{x}) - f(\mathbf{x}^*) - \left( \eta - \frac{\mu}{2} \eta^2 \right) \|\nabla f(\mathbf{x})\|^2 \\
 &\leq f(\mathbf{x}) - f(\mathbf{x}^*) - 2\gamma \left( \eta - \frac{\mu}{2} \eta^2 \right) (f(\mathbf{x}) - f(\mathbf{x}^*)) \\
 &= (1 - 2\gamma\eta + \gamma\mu\eta^2)(f(\mathbf{x}) - f(\mathbf{x}^*))
 \end{aligned}$$

where the first inequality is by the assumption that  $f$  is  $\mu$ -smooth on  $\mathcal{X}_\mu$  and the second inequality is by the assumption that  $f$  satisfies the  $\gamma$ -PL inequality on  $\mathcal{X}_\gamma$ . Taking  $\eta = 1/\mu$ , which minimizes the above bound, establishes the claim of the theorem.

### A.2 Proof of Theorem 3.2

Let  $\mathbf{x}'$  be the output of the MM algorithm iteration update for input  $\mathbf{x}$ .

By the facts  $f(\mathbf{x}') \leq g(\mathbf{x}'; \mathbf{x})$  and  $g(\mathbf{x}'; \mathbf{x}) \leq g(\mathbf{z}; \mathbf{x})$  for all  $\mathbf{z}$ , for any  $\eta \geq 0$ ,

$$\begin{aligned}
 & f(\mathbf{x}') - f(\mathbf{x}^*) \\
 &\leq g(\mathbf{x}'; \mathbf{x}) - f(\mathbf{x}^*) \\
 &\leq g(\mathbf{x} - \eta \nabla f(\mathbf{x}); \mathbf{x}) - f(\mathbf{x}^*) \\
 &= f(\mathbf{x} - \eta \nabla f(\mathbf{x})) - f(\mathbf{x}^*) \\
 &\quad + g(\mathbf{x} - \eta \nabla f(\mathbf{x}); \mathbf{x}) - f(\mathbf{x} - \eta \nabla f(\mathbf{x})).
 \end{aligned}$$

Now, by the same arguments as in the proof of Theorem 3.1, if  $\mathbf{x} \in \mathcal{X}_\gamma$  and  $\mathbf{x} - \eta \nabla f(\mathbf{x}) \in \mathcal{X}_\mu$ , we have

$$f(\mathbf{x} - \eta \nabla f(\mathbf{x})) - f(\mathbf{x}^*) \leq (1 - 2\gamma\eta + \gamma\mu\eta^2)(f(\mathbf{x}) - f(\mathbf{x}^*)).$$

Next, if  $\mathbf{x} \in \mathcal{X}_\gamma$  and  $\mathbf{x} - \eta \nabla f(\mathbf{x}) \in \mathcal{X}_\mu$ ,

$$\begin{aligned}
 & g(\mathbf{x} - \eta \nabla f(\mathbf{x}); \mathbf{x}) - f(\mathbf{x} - \eta \nabla f(\mathbf{x})) \\
 &\leq \frac{\delta}{2} \eta^2 \|\nabla f(\mathbf{x})\|^2 \\
 &\leq \delta \eta^2 \gamma (f(\mathbf{x}) - f(\mathbf{x}^*))
 \end{aligned}$$

where the first inequality is by the smoothness condition on the majorant surrogate function and the second inequality is by the assumption that  $f$  satisfies the PL inequality with parameter  $\gamma$  on  $\mathcal{X}_\gamma$ .

Putting the pieces together, we have

$$f(\mathbf{x}') - f(\mathbf{x}^*) \leq (1 - 2\gamma\eta + \gamma(\mu + \delta)\eta^2)(f(\mathbf{x}) - f(\mathbf{x}^*)).$$

Taking  $\eta = 1/(\mu + \delta)$  (which minimizes the factor involving  $\eta$  in the last inequality) yields the asserted result.

### A.3 Proof of Lemma 3.1

The Hessian of the negative log-likelihood function has the following elements:

$$\nabla^2(-\ell(\mathbf{w}))_{i,j} = \begin{cases} \sum_{v \neq i} m_{i,v} \frac{e^{w_i} e^{w_v}}{(e^{w_i} + e^{w_v})^2}, & \text{if } i = j \\ -m_{i,j} \frac{e^{w_i} e^{w_j}}{(e^{w_i} + e^{w_j})^2}, & \text{if } i \neq j. \end{cases} \quad (\text{A.1})$$

We will show that for all  $i \neq j$ ,

$$\frac{\partial^2}{\partial w_i \partial w_j}(-\ell(\mathbf{w})) \leq -c_\omega m_{i,j} \text{ for all } \mathbf{w} \in [-\omega, \omega]^n \quad (\text{A.2})$$

and

$$-\frac{1}{4} m_{i,j} \leq \frac{\partial^2}{\partial w_i \partial w_j}(-\ell(\mathbf{w})) \text{ for all } \mathbf{w} \in \mathbb{R}^n. \quad (\text{A.3})$$

From (A.2), we have  $\nabla^2(-\ell(\mathbf{w})) \succeq c_\omega \mathbf{L}_M$  for all  $\mathbf{w} \in [-\omega, \omega]^n$ . Hence, for all  $\mathbf{w} \in [-\omega, \omega]^n$  and  $\mathbf{x} \in \mathcal{X}$

$$\mathbf{x}^\top \nabla^2(-\ell(\mathbf{w})) \mathbf{x} \geq c_\omega \lambda_2(\mathbf{L}_M) \|\mathbf{x}\|^2$$

where  $\mathcal{X} = \{\mathbf{x} \in \mathbb{R}^n : \mathbf{x}^\top \mathbf{1} = 0\}$ . This shows that  $-\ell$  is  $c_\omega \lambda_2(\mathbf{L}_M)$ -strongly convex on  $\mathcal{X}$ .

From (A.3), we have  $\frac{1}{4} \mathbf{L}_M \succeq \nabla^2(-\ell(\mathbf{w}))$  for all  $\mathbf{w} \in \mathbb{R}^n$ . Hence,

$$\mathbf{x}^\top \nabla^2(-\ell(\mathbf{w})) \mathbf{x} \leq \frac{1}{4} \lambda_n(\mathbf{L}_M) \|\mathbf{x}\|^2 \text{ for all } \mathbf{x} \in \mathbb{R}^n.$$

This shows that  $-\ell$  is  $\frac{1}{4} \lambda_n(\mathbf{L}_M)$ -smooth on  $\mathbb{R}^n$ .

It remains to show that (A.2) and (A.3) hold. For (A.2), we need to show that  $c_\omega \leq x_i x_j / (x_i + x_j)^2$  for all  $\mathbf{x} \in [-\omega, \omega]^n$ . Note that  $x_i x_j / (x_i + x_j)^2 = z(1 - z)$  where  $z := x_i / (x_i + x_j)$ . Note that  $z \in \Omega := [e^{-\omega} / (e^{-\omega} + e^\omega), 1 - e^{-\omega} / (e^{-\omega} + e^\omega)]$  for all  $\mathbf{x} \in [-\omega, \omega]^n$ . The function  $z(1 - z)$  achieves its minimum over the interval  $\Omega$  at a boundary of  $\Omega$ . Thus, it holds  $\min_{z \in \Omega} z(1 - z) = c_\omega$ . For (A.3), we can immediately note that for all  $\mathbf{w} \in \mathbb{R}^n$ ,

$$\frac{w_i w_j}{(w_i + w_j)^2} = \frac{w_i}{w_i + w_j} \left( 1 - \frac{w_i}{w_i + w_j} \right) \leq \frac{1}{4}.$$

### A.4 Proof of Lemma 3.3

Let  $\mathbf{y}$  be an arbitrary vector in  $[-\omega, \omega]^n$ . Let  $r(\mathbf{x}; \mathbf{y}) = \underline{\ell}(\mathbf{x}; \mathbf{y}) - \ell(\mathbf{x})$  for  $\mathbf{x} \in [-\omega, \omega]^n$ . Then, we have

$$\begin{aligned}
 & r(\mathbf{y}; \mathbf{y}) = 0, \nabla_{\mathbf{x}} r(\mathbf{y}; \mathbf{y}) = 0, \text{ and} \\
 & \nabla_{\mathbf{x}}^2 r(\mathbf{x}; \mathbf{y}) = \nabla^2(-\ell(\mathbf{x})) + A \quad (\text{A.4})
 \end{aligned}$$

where  $A$  is a  $n \times n$  diagonal matrix with diagonal elements

$$A_{i,i} = - \sum_{j \in i} m_{i,j} \frac{e^{x_i}}{e^{y_i} + e^{y_j}} \geq -\frac{1}{2} e^{2\omega} \|\mathbf{M}\|_\infty.$$

Since  $\nabla^2(-\ell(\mathbf{x}))$  is a positive semi-definite matrix and  $A$  is a diagonal matrix, for all  $\mathbf{x}, \mathbf{y} \in [-\omega, \omega]^n$ , we have for all  $\mathbf{w} \in [-\omega, \omega]^n$

$$\mathbf{x}^\top \nabla_{\mathbf{x}}^2 r(\mathbf{w}; \mathbf{y}) \mathbf{x} \geq -\|\mathbf{M}\|_\infty \frac{e^{2\omega}}{2} \|\mathbf{x}\|^2 = -\delta \|\mathbf{x}\|^2, .$$

By limited Taylor expansion, for all  $\mathbf{x} \in [-\omega, \omega]^n$ ,

$$\begin{aligned} & r(\mathbf{x}; \mathbf{y}) \\ & \geq r(\mathbf{y}; \mathbf{y}) + (\mathbf{x} - \mathbf{y})^\top \nabla_{\mathbf{x}} r(\mathbf{y}; \mathbf{y}) \\ & \quad + \frac{1}{2} \min_{0 \leq a \leq 1} (\mathbf{x} - \mathbf{y})^\top \nabla_{\mathbf{x}}^2 r(a\mathbf{x} + (1-a)\mathbf{y}; \mathbf{y}) (\mathbf{x} - \mathbf{y}) \\ & = \frac{1}{2} \min_{0 \leq a \leq 1} (\mathbf{x} - \mathbf{y})^\top \nabla_{\mathbf{x}}^2 r(a\mathbf{x} + (1-a)\mathbf{y}) (\mathbf{x} - \mathbf{y}) \\ & \geq -\frac{\delta}{2} \|\mathbf{x} - \mathbf{y}\|^2. \end{aligned}$$

By the definition of  $r(\mathbf{x}; \mathbf{y})$ , we have  $\bar{\ell}(\mathbf{x}; \mathbf{y}) - \ell(\mathbf{x}) \geq -\frac{\delta}{2} \|\mathbf{x} - \mathbf{y}\|^2$ .

### A.5 Surrogate function (3.3) for the Bradley-Terry model is a first-order surrogate function

We show that the surrogate function  $\bar{\ell}$  of the log-likelihood function  $\ell$  of the Bradley-Terry model, given by (3.3), is a first-order surrogate function on  $\mathcal{X}_\omega = [-\omega, \omega]^n$  with  $\mu_0 = \frac{1}{2} e^{2\omega} d(\mathbf{M})$ .

We need to show that the error function  $h(\mathbf{x}; \mathbf{y}) = \ell(\mathbf{x}) - \bar{\ell}(\mathbf{x}; \mathbf{y})$  is a  $\mu_0$ -smooth function on  $\mathcal{X}_\omega$ .

By a straightforward calculus, we note

$$\nabla^2 h(\mathbf{x}; \mathbf{y}) = \nabla^2 \ell(\mathbf{x}) + D(\mathbf{x}, \mathbf{y})$$

where  $D(\mathbf{x}, \mathbf{y})$  is a diagonal matrix with diagonal elements

$$d_u = \sum_{j \neq u} m_{u,j} \frac{e^{x_u}}{e^{y_u} + e^{y_j}}.$$

We can take

$$\mu_0 = \max_{\mathbf{x}, \mathbf{y} \in \mathcal{X}_\omega} \max\{|\lambda_1(\nabla^2 h(\mathbf{x}; \mathbf{y}))|, |\lambda_n(\nabla^2 h(\mathbf{x}; \mathbf{y}))|\}.$$

For any  $A = B + D$  where  $B$  is a  $n \times n$  matrix and  $D$  is a  $n \times n$  diagonal matrix with diagonal elements  $d_1, d_2, \dots, d_n$ , we have

$$\lambda_1(B) + \min_u d_u \leq \lambda_i(A) \leq \lambda_n(B) + \max_u d_u.$$

It thus follows that

$$\mu_0 \leq \max_{\mathbf{x}, \mathbf{y} \in \mathcal{X}_\omega} \max\{|\lambda_1(\nabla^2 \ell(\mathbf{x}))| + \min_u d_u, |\lambda_n(\nabla^2 \ell(\mathbf{x})) + \max_u d_u|\}.$$

Now note that for all  $\mathbf{x}, \mathbf{y} \in \mathcal{X}_\omega$ ,

$$-\frac{1}{2} d(\mathbf{M}) \leq \lambda_1(\nabla^2 \ell(\mathbf{x})) \leq \lambda_n(\nabla^2 \ell(\mathbf{x})) = 0$$

and

$$\frac{1}{2} e^{-2\omega} \min_u \sum_{j \in u} m_{u,j} \leq \min_u d_u \leq \max_u d_u \leq \frac{1}{2} e^{2\omega} d(\mathbf{M}).$$

We have

$$|\lambda_n(\nabla^2 \ell(\mathbf{x})) + \max_u d_u| = \max_u d_u \leq \frac{1}{2} e^{2\omega} d(\mathbf{M})$$

and

$$\begin{aligned} & |\lambda_1(\nabla^2 \ell(\mathbf{x})) + \min_u d_u| \\ & = (\lambda_1(\nabla^2 \ell(\mathbf{x})) + \min_u d_u) \mathbf{1}_{\lambda_1(\nabla^2 \ell(\mathbf{x})) + \min_u d_u \geq 0} \\ & \quad + (-\lambda_1(\nabla^2 \ell(\mathbf{x})) - \min_u d_u) \mathbf{1}_{-\lambda_1(\nabla^2 \ell(\mathbf{x})) - \min_u d_u < 0} \\ & \leq \min_u d_u \mathbf{1}_{\lambda_1(\nabla^2 \ell(\mathbf{x})) + \min_u d_u \geq 0} \\ & \quad - \lambda_1(\nabla^2 \ell(\mathbf{x})) \mathbf{1}_{-\lambda_1(\nabla^2 \ell(\mathbf{x})) - \min_u d_u < 0} \\ & \leq \frac{1}{2} e^{2\omega} d(\mathbf{M}) \mathbf{1}_{\lambda_1(\nabla^2 \ell(\mathbf{x})) + \min_u d_u \geq 0} \\ & \quad + \frac{1}{2} d(\mathbf{M}) \mathbf{1}_{-\lambda_1(\nabla^2 \ell(\mathbf{x})) - \min_u d_u < 0} \\ & \leq \frac{1}{2} e^{2\omega} d(\mathbf{M}). \end{aligned}$$

### A.6 Proof of Lemma 3.4

We consider the log-a posteriori probability function  $\rho(\mathbf{w}) = \ell(\mathbf{w}) + \ell_0(\mathbf{w}) + \text{const}$  where  $\ell$  is the log-likelihood function given by (3.1) and  $\ell_0$  is the prior log-likelihood function given by (3.5). Note that  $\nabla^2(-\ell_0(\mathbf{w}))$  is a diagonal matrix with diagonal elements equal to  $\beta e^{w_i}$ , for  $i = 1, 2, \dots, n$ . It can be readily shown that for  $\mathbf{w} \in \mathcal{W}_\omega$ ,

$$c_\omega \mathbf{L}_\mathbf{M} + e^{-\omega} \beta \mathbf{I}_n \preceq \nabla^2(-\rho(\mathbf{w})) \preceq \frac{1}{4} \mathbf{L}_\mathbf{M} + e^\omega \beta \mathbf{I}_n. \quad (\text{A.5})$$

From (A.5), for all  $\mathbf{w} \in \mathcal{W}_\omega$  and  $\mathbf{x} \in \mathbb{R}^n$ ,

$$\mathbf{x}^\top \nabla^2(-\rho(\mathbf{w})) \mathbf{x} \geq \lambda_1(e^{-\omega} \beta \mathbf{I}_n) \|\mathbf{x}\|^2 = e^{-\omega} \beta \|\mathbf{x}\|^2.$$

Hence,  $-\rho$  is  $e^{-\omega} \beta$ -strongly convex on  $\mathcal{W}_\omega$ .

Similarly, from (A.5), for all  $\mathbf{w} \in \mathcal{W}_\omega$ , and  $\mathbf{x} \in \mathbb{R}^n$ ,

$$\begin{aligned} \mathbf{x}^\top \nabla^2(-\rho(\mathbf{w})) \mathbf{x} & \leq \lambda_n\left(\frac{1}{4} \mathbf{L}_\mathbf{M} + e^\omega \beta \mathbf{I}_n\right) \|\mathbf{x}\|^2 \\ & \leq \left(\lambda_n\left(\frac{1}{4} \mathbf{L}_\mathbf{M}\right) + \lambda_n(e^\omega \beta \mathbf{I}_n)\right) \|\mathbf{x}\|^2 \\ & = \left(\frac{1}{4} \lambda_n(\mathbf{L}_\mathbf{M}) + e^\omega \beta\right) \|\mathbf{x}\|^2. \end{aligned}$$

Hence,  $-\rho$  is  $\mu$ -smooth on  $\mathcal{W}_\omega$  with  $\mu = \frac{1}{4}\lambda_n(\mathbf{L}_M) + e^\omega\beta$ .

## B Comparison of Theorem 3.2 with Proposition 2.7 Mairal (2015)

**Theorem B.1.** *Suppose that  $f$  is a strongly convex function on  $\mathcal{X}_\gamma$  and  $\mathbf{x}^*$  is a minimizer of  $f$  and that it holds  $\mathbf{x}^* \in \mathcal{X}_\gamma$ . Assume that  $g$  is a first-order surrogate function of  $f$  on  $\mathcal{X}_\mu$  with parameter  $\mu_0 > 0$ . Let  $\mathbf{x}^{(t+1)}$  be the output of the MM algorithm for input  $\mathbf{x}^{(t)}$ . Then, if  $\mathbf{x}^{(t)} \in \mathcal{X}_\gamma$  and  $\mathbf{x}^{(t+1)} \in \mathcal{X}_\mu$ , then we have*

$$f(\mathbf{x}^{(t+1)}) - f(\mathbf{x}^*) \leq c(f(\mathbf{x}^{(t)}) - f(\mathbf{x}^*))$$

where

$$c = \begin{cases} \frac{\mu_0}{\gamma}, & \text{if } \gamma > 2\mu_0 \\ 1 - \frac{\gamma}{4\mu_0}, & \text{if } \gamma \leq 2\mu_0. \end{cases}$$

*Proof.* If  $g$  is a first-order surrogate function on  $\mathcal{X}_\mu$  with parameter  $\mu_0$ , then

$$f(\mathbf{x}') \leq f(\mathbf{z}) + \frac{\mu_0}{2}\|\mathbf{z} - \mathbf{y}\|^2$$

where  $\mathbf{x}' = \arg \min_{\mathbf{z}'} g(\mathbf{z}'; \mathbf{y})$ .

From this it follows that

$$\begin{aligned} & f(\mathbf{x}') \\ & \leq \min_{\mathbf{z}} \left\{ f(\mathbf{z}) + \frac{\mu_0}{2}\|\mathbf{z} - \mathbf{x}^*\|^2 \right\} \\ & \leq \min_{a \in [0,1]} \left\{ f(a\mathbf{x}^* + (1-a)\mathbf{x}) + \frac{\mu_0 a^2}{2}\|\mathbf{x} - \mathbf{x}^*\|^2 \right\} \\ & \leq \min_{a \in [0,1]} \left\{ a f(\mathbf{x}^*) + (1-a)f(\mathbf{x}) + \frac{\mu_0 a^2}{2}\|\mathbf{x} - \mathbf{x}^*\|^2 \right\} \end{aligned}$$

where the last inequality is by convexity of  $f$ .

We have established that

$$\begin{aligned} & f(\mathbf{x}') - f(\mathbf{x}^*) \\ & \leq \min_{a \in [0,1]} \left\{ (1-a)(f(\mathbf{x}) - f(\mathbf{x}^*)) + \frac{\mu_0 a^2}{2}\|\mathbf{x} - \mathbf{x}^*\|^2 \right\}. \end{aligned}$$

By assumption that  $f$  is  $\gamma$ -strongly convex on  $\mathcal{X}_\gamma$  and  $\mathbf{x} \in \mathcal{X}_\gamma$ , we have

$$f(\mathbf{x}) - f(\mathbf{x}^*) \geq \frac{\gamma}{2}\|\mathbf{x} - \mathbf{x}^*\|^2.$$

It follows that

$$\begin{aligned} & f(\mathbf{x}') - f(\mathbf{x}^*) \\ & \leq \min_{a \in [0,1]} \left\{ 1 - a + \frac{\mu_0 a^2}{\gamma} \right\} (f(\mathbf{x}) - f(\mathbf{x}^*)). \end{aligned}$$

It remains only to note that

$$\min_{a \in [0,1]} \left\{ 1 - a + \frac{\mu_0 a^2}{\gamma} \right\} = c. \quad \square$$

The rate of convergence bound derived from Theorem 3.2 can be tighter than the rate of convergence bound derived from Theorem B.1.

To show this consider the Bradley-Terry model for which we have shown in Lemma 3.3 that the surrogate function  $\underline{\ell}$  of the log-likelihood function  $\ell$  satisfies condition of Theorem 3.2 on  $[-\omega, \omega]^n$  with  $\delta = \frac{1}{2}e^{2\omega}d(\mathbf{M})$ . It also holds that surrogate function  $\underline{\ell}$  is also a first-order surrogate function of  $\ell$  on  $[-\omega, \omega]^n$  with  $\mu_0 = \frac{1}{2}e^{2\omega}d(\mathbf{M})$ . Hence in this case, we have  $\delta = \mu_0$ .

The convergence rate bound of Theorem 3.2 is tighter than the convergence rate bound of Theorem B.1 if and only if  $\mu + \delta < 4\mu_0$ . Since  $\delta = \mu_0$ , this is equivalent to  $\mu < 3\delta$ . Since by Lemma 3.1 we can take  $\mu = \frac{1}{2}d(\mathbf{M})$ , the latter condition reads as

$$1 < 3e^\omega$$

which indeed holds true.

## C Generalized Bradley-Terry models

### C.1 Generalized Bradley-Terry models

**Bradley-Terry model of paired comparisons** According to the Bradley-Terry model, each paired comparison of items  $i$  and  $j$  has two possible outcomes: either  $i$  wins against  $j$  ( $i \succ j$ ) or  $j$  wins against  $i$  ( $j \succ i$ ). The distribution of the outcomes is given by

$$\Pr[i \succ j] = \frac{e^{w_i}}{e^{w_i} + e^{w_j}}$$

where  $\mathbf{w} = (w_1, w_2, \dots, w_n)^\top \in \mathbb{R}^n$  are model parameters.

**Rao-Kupper model of paired comparisons with ties** The Rao-Kupper model is such that each paired comparison of items  $i$  and  $j$  has three possible outcomes: either  $i \succ j$  or  $j \succ i$  or  $i \equiv j$  (tie). The model is defined by the probability distribution of outcomes that is given by

$$\Pr[i \succ j] = \frac{e^{w_i}}{e^{w_i} + \theta e^{w_j}}$$

and

$$\Pr[i \equiv j] = \frac{(\theta^2 - 1)e^{w_i}e^{w_j}}{(e^{w_i} + \theta e^{w_j})(\theta e^{w_i} + e^{w_j})}$$

where  $\mathbf{w} = (w_1, w_2, \dots, w_n)^\top \in \mathbb{R}^n$  and  $\theta \geq 1$  are model parameters.

The larger the value of parameter  $\theta$ , the more mass is put on the tie outcome. For the value of parameter  $\theta = 1$ , the model corresponds to the Bradley-Terry model for paired comparisons.

**Luce choice model** The Luce choice model is a natural generalization of the Bradley-Terry model of paired comparisons to comparison sets of two or more items. For any given comparison set  $S \subseteq N = \{1, 2, \dots, n\}$  of two or more items, the outcome is a choice of one item  $i \in S$  (an event we denote as  $i \succeq S$ ) which occurs with probability

$$\Pr[i \succeq S] = \frac{e^{w_i}}{\sum_{j \in S} e^{w_j}}$$

where  $\mathbf{w} = (w_1, w_2, \dots, w_n)^\top \in \mathbb{R}_n$  are model parameters.

We will use the following definitions and notation. Let  $T$  be the set of ordered sequences of two or more items from  $N$  such that for each  $y = (y_1, y_2, \dots, y_k) \in T$ ,  $y_1$  is an arbitrary item and  $y_2, \dots, y_k$  are sorted in lexicographical order. We can interpret each  $y = (y_1, y_2, \dots, y_k) \in T$  as a choice of item  $y_1$  from the set of items  $\{y_1, y_2, \dots, y_k\}$ . According to the Luce's choice model, the probability of outcome  $y$  is given by

$$\Pr[Y = (y_1, y_2, \dots, y_k)] = \frac{e^{w_{y_1}}}{\sum_{j \in y} e^{w_j}}.$$

We denote with  $d_y$  the number of observed outcomes  $y$  in the input data. For each  $y \in T$ , let  $|y|$  denote the number of items in  $y$ .

**Plackett-Luce ranking model** The Plackett-Luce ranking model is a model of full rankings: for each comparison set of items  $S \subseteq N = \{1, 2, \dots, n\}$ , the set of possible outcomes contains all possible permutations of items in  $S$ . The distribution over possible outcomes is defined as follows. Let  $T$  be the set of all possible permutations of subsets of two or more items from  $N$ . Each  $y = (y_1, y_2, \dots, y_k) \in T$  corresponds to a permutation of the set of items  $S = \{y_1, y_2, \dots, y_k\}$ . The probability of outcome  $y$  is given by

$$\Pr[Y = (y_1, y_2, \dots, y_k)] = \frac{e^{w_{y_1}}}{\sum_{j=1}^k e^{w_{y_j}}} \frac{e^{w_{y_2}}}{\sum_{j=2}^k e^{w_{y_j}}} \cdots \frac{e^{w_{y_{k-1}}}}{\sum_{j=k-1}^k e^{w_{y_j}}}$$

where  $\mathbf{w} = (w_1, w_2, \dots, w_n)^\top \in \mathbb{R}_n$  are model parameters.

The model has an intuitive explanation as a sampling of items without replacement proportional to the item weights  $e^{w_i}$ . The Plackett-Luce ranking model corresponds to the Bradley-Terry model of paired comparisons when the comparison sets consist of two items.

We denote with  $d_y$  the number of observed outcomes  $y$  in the input data.

In this section, we discuss how the results for Bradley-Terry model of paired comparisons can be extended to other instances of generalized Bradley-Terry models. In particular, we show this for the Rao-Kupper model of paired comparisons with tie outcomes, the Luce choice model and the Plackett-Luce ranking model.

## C.2 Rao-Kupper model

The probability distribution of outcomes according to the Rao-Kupper model is defined in Section C.1. The log-likelihood function can be written as

$$\begin{aligned} \ell(\mathbf{w}) &= \sum_{i=1}^n \sum_{j \neq i} \bar{d}_{i,j} (w_i - \log(e^{w_i} + \theta e^{w_j})) + \\ &\quad \frac{1}{2} \sum_{i=1}^n t_{i,i} \log(\theta^2 - 1) \end{aligned}$$

where  $\bar{d}_{i,j}$  is the number of observed paired comparisons of items  $i$  and  $j$  such that either  $i$  wins against  $j$  or there is a tie outcome, and  $t_{i,i}$  is the number of observed paired comparisons of items  $i$  and  $j$  with tie outcomes.

**Lemma C.1.** *The negative log-likelihood function for the Rao-Kupper model of paired comparisons with parameter  $\theta > 1$  is  $\gamma$ -strongly convex on  $\mathcal{W}_\omega = \{\mathbf{w} \in \mathbb{R}^n : \|\mathbf{w}\|_\infty \leq \omega \text{ and } \mathbf{w}^\top \mathbf{1} = 0\}$  and  $\mu$ -smooth on  $\mathbb{R}^n$  with*

$$\gamma = c_{\theta,\omega} \lambda_2(\mathbf{L}_M) \text{ and } \mu = \frac{1}{2} \lambda_n(\mathbf{L}_M)$$

where  $c_{\theta,\omega} = \theta / (\theta e^{-\omega} + e^\omega)^2$ .

Proof of Lemma C.1 is provided in Appendix C.5.

A surrogate minorant function for the log-likelihood function of the Rao-Kupper model is given as follows:

$$\begin{aligned} \underline{\ell}(\mathbf{x}; \mathbf{y}) &= \sum_{i=1}^n \sum_{j \neq i} \bar{d}_{i,j} \left( x_i - \frac{e^{x_i} + \theta e^{x_j}}{e^{y_i} + \theta e^{y_j}} - \log(e^{y_i} + \theta e^{y_j}) + 1 \right) \\ &\quad + \frac{1}{2} \sum_{i=1}^n t_{i,i} \log(\theta^2 - 1). \end{aligned}$$

The MM algorithm is defined by, for  $i = 1, 2, \dots, n$ ,

$$\begin{aligned} w_i^{(t+1)} &= \log \left( \sum_{j \neq i} \bar{d}_{i,j} \right) - \\ &\quad \log \left( \sum_{j \neq i} \left( \frac{\bar{d}_{i,j}}{e^{w_i^{(t)}} + \theta e^{w_j^{(t)}}} + \frac{\theta \bar{d}_{j,i}}{e^{w_j^{(t)}} + \theta e^{w_i^{(t)}}} \right) \right). \end{aligned}$$

**Lemma C.2.** For all  $\mathbf{x}, \mathbf{y} \in [-\omega, \omega]^n$ ,  $\underline{\ell}(\mathbf{x}; \mathbf{y}) - \ell(\mathbf{x}) \geq -\frac{\delta}{2} \|\mathbf{x} - \mathbf{y}\|^2$  where

$$\delta = e^{2\omega} d(\mathbf{M}).$$

### C.3 Luce choice model

The probability distribution of outcomes according to the Luce choice model is defined in Section C.1. The log-likelihood function can be written as:

$$\ell(\mathbf{w}) = \sum_{y \in T} d_y \left( w_{y_1} - \log \left( \sum_{j \in y} e^{w_j} \right) \right).$$

**Lemma C.3.** The negative log-likelihood function for the Luce choice model with comparison sets of size  $k \geq 2$  is  $\gamma$ -strongly convex and  $\mu$ -smooth on  $\mathcal{W}_\omega = \{\mathbf{w} \in \mathbb{R}^n : \|\mathbf{w}\|_\infty \leq \omega \text{ and } \mathbf{w}^\top \mathbf{1} = 0\}$  with

$$\gamma = c_{\omega,k} \lambda_2(\mathbf{L}_\mathbf{M}) \text{ and } \mu = d_{\omega,k} \lambda_n(\mathbf{L}_\mathbf{M})$$

where

$$c_{\omega,k} = \begin{cases} 1/(e^{-\omega} + e^\omega)^2, & \text{if } k = 2 \\ 1/((k-2)e^{2\omega} + 2)^2, & \text{if } k > 2 \end{cases} \text{ and} \\ d_{\omega,k} = \frac{1}{((k-2)e^{-2\omega} + 2)^2}.$$

Note that for every fixed  $\omega > 0$ , (a)  $c_{\omega,k}/d_{\omega,k}$  is decreasing in  $k$ , (b)  $1/e^{8\omega} \leq c_{\omega,k}/d_{\omega,k} \leq 1/e^{2\omega}$ , and (c)  $1/e^{8\omega}$  is the limit value of  $c_{\omega,k}/d_{\omega,k}$  as  $k$  goes to infinity.

A minorant surrogate function for the log-likelihood function of the Luce choice model is given by

$$\underline{\ell}(\mathbf{x}; \mathbf{y}) = \sum_{y \in T} d_y \left( x_{y_1} - \frac{\sum_{j \in y} e^{x_j}}{\sum_{j \in y} e^{y_j}} - \log \left( \sum_{j \in y} e^{y_j} \right) + 1 \right). \quad \underline{\ell}(\mathbf{x}; \mathbf{y}) = \sum_{y \in T} d_y \sum_{r=1}^{|y|-1} \left( x_{y_r} - \frac{\sum_{j=r}^{|y|} e^{x_{y_j}}}{\sum_{j=r}^{|y|} e^{y_{y_j}}} - \log \left( \sum_{j=r}^{|y|} e^{y_{y_j}} \right) + 1 \right).$$

The MM algorithm iteration can be written as: for  $i = 1, 2, \dots, n$ ,

$$w_i^{(t+1)} = \log \left( \sum_{y \in T} d_y \mathbf{1}_{i=y_1} \right) - \log \left( \sum_{y \in T} d_y \mathbf{1}_{i \in y} \frac{1}{\sum_{j \in y} e^{w_j^{(t)}}} \right)$$

where  $\sum_{y \in T} d_y \mathbf{1}_{i=y_1}$  is the number of observed comparisons in which item  $i$  is the chosen item.

**Lemma C.4.** For all  $\mathbf{x}, \mathbf{y} \in [-\omega, \omega]^n$ ,  $\underline{\ell}(\mathbf{x}; \mathbf{y}) - \ell(\mathbf{x}) \geq -\frac{\delta}{2} \|\mathbf{x} - \mathbf{y}\|^2$  where

$$\delta = \frac{1}{k(k-1)} e^{2\omega} d(\mathbf{M}).$$

### C.4 Plackett-Luce ranking model

The probability distribution of outcomes according to the Plackett-Luce ranking model is defined in Section C.1. The log-likelihood function can be written as follows:

$$\ell(\mathbf{w}) = \sum_{y \in T} d_y \sum_{r=1}^{|y|-1} \left( w_{y_r} - \log \left( \sum_{j=r}^{|y|} e^{w_{y_j}} \right) \right).$$

**Lemma C.5.** The negative log-likelihood function for the Plackett-Luce ranking model with comparison sets of size  $k \geq 2$  is  $\gamma$ -strongly convex and  $\mu$ -smooth on  $\mathcal{W}_\omega = \{\mathbf{w} \in \mathbb{R}^n : \|\mathbf{w}\|_\infty \leq \omega \text{ and } \mathbf{w}^\top \mathbf{1} = 0\}$  with

$$\gamma = \tilde{c}_{\omega,k} \lambda_2(\mathbf{L}_\mathbf{M}) \text{ and } \mu = \tilde{d}_{\omega,k} \lambda_n(\mathbf{L}_\mathbf{M})$$

where

$$\tilde{c}_{\omega,k} = \frac{1}{k^2} e^{-4\omega} \text{ and } \tilde{d}_{\omega,k} = \left( 2 - \frac{1}{k} \right) e^{4\omega}.$$

Proof of Lemma C.5 is provided in Appendix C.6.

Note that for fixed values of  $\omega$  and  $k$ , Lemma C.5 implies the convergence time  $\log(d(\mathbf{M})/a(\mathbf{M}))$ . Note, however, that for fixed  $\omega > 0$ ,  $\tilde{c}_{\omega,k}/\tilde{d}_{\omega,k}$  decreases to 0 with  $k$  and is of the order  $1/k^2$ . This is because in the derivation of parameters  $\tilde{c}_{\omega,k}$  and  $\tilde{d}_{\omega,k}$  we use (conservative) deterministic bounds. Following Hajek et al. (2014), one can derive bounds for  $\gamma$  and  $\mu$  that hold with high probability, which are such that  $\tilde{c}_{\omega,k}$  and  $\tilde{d}_{\omega,k}$  scale with  $k$  in the same way.

The log-likelihood function of the Plackett-Luce ranking model admits the following minorization function:

The MM algorithm is given by: for  $i = 1, 2, \dots, n$ ,

$$w_i^{(t+1)} = \log \left( \sum_{y \in T} d_y \mathbf{1}_{i \in S_{1,|y|-1}(y)} \right) - \log \left( \sum_{y \in T} d_y \sum_{r=1}^{|y|-1} \mathbf{1}_{i \in S_{r,|y|}(y)} \frac{1}{\sum_{j=r}^{|y|} e^{w_{y_j}^{(t)}}} \right)$$

where  $S_{a,b}(y) = \{y_a, y_{a+1}, \dots, y_b\}$ .

**Lemma C.6.** For all  $\mathbf{x}, \mathbf{y} \in [-\omega, \omega]^n$ ,  $\underline{\ell}(\mathbf{x}; \mathbf{y}) - \ell(\mathbf{x}) \geq -\frac{\delta}{2} \|\mathbf{x} - \mathbf{y}\|^2$  where

$$\delta = \frac{1}{2} e^{2\omega} d(\mathbf{M}).$$

### C.5 Proof of Lemma C.1

Let  $t_{i,j}$  be the number of paired comparisons in the input data with tie outcome for items  $i$  and  $j$ . Note that  $t_{i,j} = t_{j,i}$ . The log-likelihood function can be written as follows:

$$\begin{aligned} \ell(\mathbf{w}) &= \sum_{i=1}^n \sum_{j \neq i} d_{i,j} (w_i - \log(e^{w_i} + \theta e^{w_j})) \\ &\quad + \frac{1}{2} \sum_{i=1}^n \sum_{j \neq i} t_{i,j} (w_i + w_j - \log(e^{w_i} + \theta e^{w_j})) \\ &\quad - \frac{1}{2} \sum_{i=1}^n \sum_{j \neq i} t_{i,j} (\log(\theta e^{w_i} + e^{w_j}) - \log(\theta^2 - 1)). \end{aligned}$$

Let  $\bar{d}_{i,j}$  be the number of paired comparisons of items  $i$  and  $j$  such that  $i \succeq j$ , i.e.  $\bar{d}_{i,j} = d_{i,j} + t_{i,j}$ . By a straightforward calculus, we can write

$$\begin{aligned} \ell(\mathbf{w}) &= \sum_{i=1}^n \sum_{j \neq i} \bar{d}_{i,j} (w_i - \log(e^{w_i} + \theta e^{w_j})) \\ &\quad + \frac{1}{2} \sum_{i=1}^n t_{i,j} \log(\theta^2 - 1). \end{aligned}$$

Now, we note when  $i \neq j$ ,

$$\begin{aligned} &\frac{\partial^2}{\partial w_i \partial w_j} (-\ell(\mathbf{w})) \\ &= -\bar{d}_{i,j} \frac{\theta e^{w_i} e^{w_j}}{(e^{w_i} + \theta e^{w_j})^2} - \bar{d}_{j,i} \frac{\theta e^{w_i} e^{w_j}}{(\theta e^{w_i} + e^{w_j})^2} \end{aligned}$$

and

$$\frac{\partial^2}{\partial w_i^2} (-\ell(\mathbf{w})) = - \sum_{j \neq i} \frac{\partial^2}{\partial w_u \partial w_j} (-\ell(\mathbf{w})).$$

For any  $i \neq j$ , it indeed holds

$$\frac{\theta e^{w_i} e^{w_j}}{(e^{w_i} + \theta e^{w_j})^2} \leq \frac{1}{4}.$$

Hence, when  $i \neq j$ ,

$$\frac{\partial^2}{\partial w_i \partial w_j} (-\ell(\mathbf{w})) \geq -\frac{1}{4} (\bar{d}_{i,j} + \bar{d}_{j,i}) \geq -\frac{1}{2} m_{i,j}.$$

It follows that  $\frac{1}{2} \mathbf{L}_M \succeq \nabla^2(-\ell(\mathbf{w}))$  for all  $\mathbf{w} \in \mathbb{R}^n$ . Hence,

$$\mathbf{x}^\top \nabla^2(-\ell(\mathbf{w})) \mathbf{x} \leq \frac{1}{2} \lambda_n(\mathbf{L}_M) \text{ for all } \mathbf{x} \in \mathbb{R}^n.$$

This implies that  $-\ell$  is a  $\frac{1}{2} \lambda_n(\mathbf{L}_M)$ -smooth function on  $\mathbb{R}^n$ .

On the other hand, we can show that for all  $\mathbf{w} \in [-\omega, \omega]^n$ ,

$$\frac{\theta e^{w_i} e^{w_j}}{(e^{w_i} + \theta e^{w_j})^2} \geq \frac{\theta}{(\theta e^{-\omega} + e^\omega)^2} := c_{\theta, \omega}.$$

This can be noted as follows. Let  $z = \theta e^{w_j} / (e^{w_i} + \theta e^{w_j})$ . Note that

$$\frac{\theta e^{w_i} e^{w_j}}{(e^{w_i} + \theta e^{w_j})^2} = z(1-z)$$

and that  $z \in \Omega := [1/(1 + \theta e^{2\omega}), 1/(1 + \theta e^{-2\omega})]$ . The function  $z(1-z)$  is convex and thus achieves its minimum value over the interval  $\Omega$  at one of its boundary points. It can be readily checked that the minimum is achieved at  $z^* = 1/(1 + \theta e^{2\omega})$ , which yields  $z^*(1-z^*) = c_{\theta, \omega}$ .

Hence, when  $i \neq j$ ,

$$\frac{\partial^2}{\partial w_i \partial w_j} (-\ell(\mathbf{w})) \leq -c_{\theta, \omega} (\bar{d}_{i,j} + \bar{d}_{j,i}) \leq -c_{\theta, \omega} m_{i,j}.$$

It follows that  $\nabla^2(-\ell(\mathbf{w})) \succeq c_{\theta, \omega} \mathbf{L}_M$ . From this, we have that for all  $\mathbf{w} \in [-\omega, \omega]^n$  and  $\mathbf{x} \in \mathcal{X}$

$$\mathbf{x}^\top \nabla^2(-\ell(\mathbf{w})) \mathbf{x} \geq c_{\theta, \omega} \lambda_2(\mathbf{L}_M)$$

where  $\mathcal{X} = \{\mathbf{x} \in \mathbb{R}^n : \|\mathbf{x}\|_\infty \leq \omega \text{ and } \mathbf{x}^\top \mathbf{1} = 0\}$ . This implies that  $-\ell$  is  $c_{\theta, \omega} \lambda_2(\mathbf{L}_M)$ -strongly convex on  $\mathcal{X}$ .

### C.6 Proof of Lemma C.5

It can be easily shown that for all  $\mathbf{w} \in [-\omega, \omega]^n$ ,  $S \subseteq N$  such that  $|S| \geq 2$ , and  $u, v \in S$  such that  $u \neq v$ , we have

$$\frac{e^{-4\omega}}{|S|^2} \leq \frac{e^{w_u} e^{w_v}}{(\sum_{j \in S} e^{w_j})^2} \leq \frac{e^{4\omega}}{|S|^2}.$$

Combining with (A.1), we have

$$\begin{aligned} &\frac{\partial^2}{\partial w_u \partial w_v} (-\ell(\mathbf{w})) \\ &\leq - \sum_{y \in T} d_y \frac{w_u w_v}{(\sum_{j=1}^k e^{w_{y_j}})^2} \mathbf{1}_{u,v \in \{y_1, y_2, \dots, y_k\}} \\ &\leq - \frac{e^{-4\omega}}{k^2} \sum_{y \in T} d_\pi \mathbf{1}_{u,v \in \{y_1, y_2, \dots, y_k\}} \\ &= - \frac{e^{-4\omega}}{k^2} m_{u,v}. \end{aligned}$$

From this it follows that for all  $\mathbf{x} \in \mathbb{R}^n$  such that  $\mathbf{x}^\top \mathbf{1} = 0$ ,

$$\mathbf{x}^\top \nabla^2(-\ell(\mathbf{w})) \mathbf{x} \geq \frac{e^{-4\omega}}{k^2} \lambda_2(\mathbf{L}_M) \|\mathbf{x}\|^2. \quad (\text{C.1})$$

Similarly, we have

$$\begin{aligned}
 & \frac{\partial^2}{\partial w_u \partial w_v} (-\ell(\mathbf{w})) \\
 \geq & - \sum_{y \in T} d_y \sum_{l=1}^{k-1} \frac{w_u w_v}{(\sum_{j=l}^k e^{w_{y_j}})^2} 1_{u,v \in \{y_1, y_2, \dots, y_k\}} \\
 \geq & -e^{4\omega} \sum_{l=1}^{k-1} \frac{1}{(k-l+1)^2} m_{u,v} \\
 = & -e^{4\omega} \sum_{l=2}^k \frac{1}{l^2} m_{u,v} \\
 \geq & -e^{4\omega} \left( 1 + \int_1^k \frac{dx}{x^2} \right) m_{u,v} \\
 = & -e^{4\omega} \left( 2 - \frac{1}{k} \right) m_{u,v}.
 \end{aligned}$$

From this it follows that for all  $\mathbf{x}$ ,

$$\mathbf{x}^\top \nabla^2 (-\ell(\mathbf{w})) \mathbf{x} \leq e^{4\omega} \left( 2 - \frac{1}{k} \right) \lambda_n(\mathbf{L}_M) \|\mathbf{x}\|^2. \quad (\text{C.2})$$

## D Code and Dataset

The code and datasets for reproducing our experiments are available online:

<https://github.com/GDMMBT/GDMM>.
